# Supplementary material
Source: MDPI journal article supplement (https://www.mdpi.com/2073-4352/13/9/1340)
Supplement: s1 [file s1]

Supplementary file

# Structural Aspects of $\text{Pt}(\eta^3\text{-P}^1\text{C}_2\text{X}^1\text{C}_2\text{P}^2)(\text{Y})$ Derivatives-Types

Milan Melník <sup>1,2,\*</sup>, Veronika Mikušová <sup>3</sup> and Peter Mikuš <sup>1,4,\*</sup>

<sup>1</sup> Department of Pharmaceutical Analysis and Nuclear Pharmacy, Faculty of Pharmacy, Comenius University Bratislava, Odbojárov 10, SK-832 32 Bratislava, Slovakia

<sup>2</sup> Faculty of Chemical and Food Technology Slovak University of Technology in Bratislava, Radlinského 9, SK-812 37 Bratislava, Slovakia

<sup>3</sup> Department of Galenic Pharmacy, Faculty of Pharmacy, Comenius University Bratislava, Odbojárov 10, SK-832 32 Bratislava, Slovakia; mikusova@fpharm.uniba.sk

<sup>4</sup> Toxicological and Antidoping Centre, Faculty of Pharmacy, Comenius University Bratislava, Odbojárov 10, SK-832 32 Bratislava, Slovakia

\* Correspondence: qmelnik@stuba.sk (M.M.); mikus@fpharm.uniba.sk (P.M.)

## Table of content

**Table S1.** Structures and applications of  $\text{Pt}\{\eta^3\text{-P}^1\text{X}^1\text{P}^2\}(\text{Y})$ , ( $\text{X}^1=\text{O}^1, \text{N}^1$ ), ( $\text{Y}=\text{C}^2\text{L}, \text{N}^2\text{L}, \text{Cl}, \text{P}^3\text{L}$ ) complexes

**Table S2.** Structures and applications of  $\text{Pt}\{\eta^3\text{-P}^1\text{C}^1\text{P}^2\}(\text{Y})$ , ( $\text{Y}=\text{O}^2\text{L}, \text{N}^2\text{L}, \text{Cl}, \text{Cl}, \text{Br}$ ) complexes

**Table S3.** Structures and applications of  $\text{Pt}(\eta^3\text{-P}^1\text{X}^1\text{P}^2)(\text{Y})$ , ( $\text{X}^1 = \text{S}^1$  or  $\text{Si}^1$ ) ( $\text{Y}=\text{C}^2\text{L}, \text{Cl}, \text{P}^3\text{L}, \text{I}, \text{H}, \text{O}^2\text{L}$ ) complexes

**Table S1.** Structures and applications of  $\text{Pt}\{\eta^3\text{-P}^1\text{X}^1\text{P}^2\}(\text{Y})$ , ( $\text{X}^1=\text{O}^1, \text{N}^1$ ), ( $\text{Y}=\text{C}^2\text{L}, \text{N}^2\text{L}, \text{Cl}, \text{P}^3\text{L}$ ) complexes<sup>a</sup>

| Complex                                                                                                                                                                                                                        | Structure | Application and Ref.                                                                                                                                                                                                                                                                                                                |
|--------------------------------------------------------------------------------------------------------------------------------------------------------------------------------------------------------------------------------|-----------|-------------------------------------------------------------------------------------------------------------------------------------------------------------------------------------------------------------------------------------------------------------------------------------------------------------------------------------|
| $[\text{Pt}\{\eta^3\text{-Ph}_2\text{P}(\text{C}_{15}\text{H}_{12}\text{O})\text{PPh}_2\}\{\eta^1\text{-P}^3(\text{C}_5\text{H}_4\text{N})(\text{Ph})_2\}]\cdot 2\text{CF}_3\text{SO}_3\cdot 0.5\text{H}_2\text{O}$ (at 150 K) |           | reactivity of platinum complexes towards dihydrogen; platinum complexes react smoothly with dihydrogen under mild conditions to produce stable hydride complexes [19]                                                                                                                                                               |
| $[\text{Pt}\{\eta^3\text{-Ph}_2\text{P}(\text{C}_{12}\text{H}_8\text{N})\text{PPh}_2\}\{\eta^1, \text{N}^1, \text{P}^2\}(\text{py})\text{CF}_3\text{SO}_3\cdot \text{toluene}]$                                                |           | the amido diphosphine complexes $[\text{PNP}]\text{PtMe}$ and $[\text{PNP}]\text{PtOTf}$ , where $[\text{PNP}]_2$ is bis(2-diphenylphosphinophenyl)-amide effectively activate the benzene C–H bond in the presence of an appropriate Lewis acid or base, leading to the formation of $[\text{PNP}]\text{PtPh}$ quantitatively [20] |
| $[\text{Pt}\{\eta^3\text{-Ph}_2\text{P}(\text{C}_{12}\text{H}_8\text{N})\text{PPh}_2\}(\text{Cl})]\cdot 0.5\text{C}_6\text{H}_6$                                                                                               |           |                                                                                                                                                                                                                                                                                                                                     |

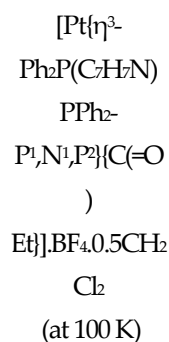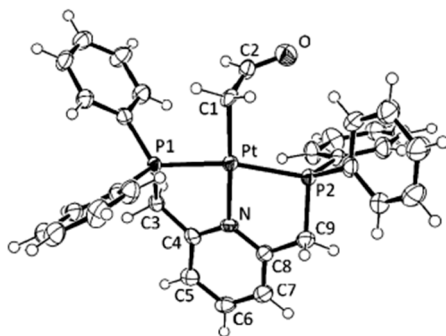

a dicationic platinum(II) complex providing water addition to alkynes; represents an innovative solution for the hydration of alkynes as an important reaction to synthesize aldehydes or ketones [22]

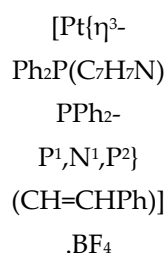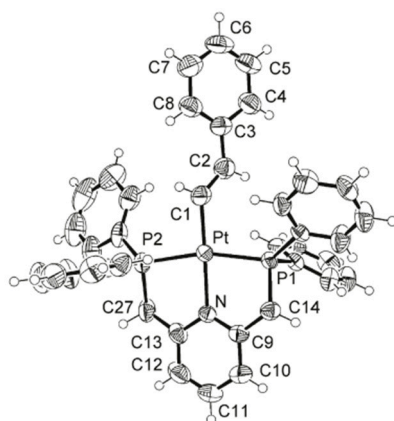

dicationic platinum(II) monoalkene complexes act in C-C, C-N, and C-O bond formations; vinylic deprotonation was observed with the platinum styrene complex [23]

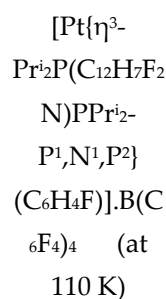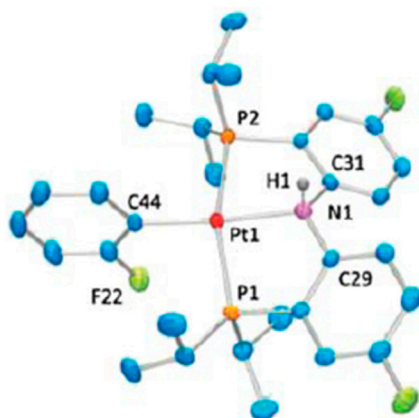

frustrated Lewis pair-like splitting of aromatic C-H bonds and abstraction of halogen atoms by a cationic [(FPNP)Pt]<sup>+</sup> species [24]

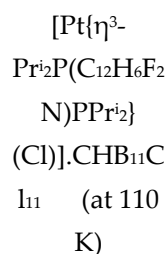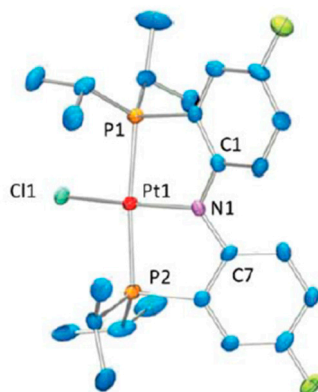

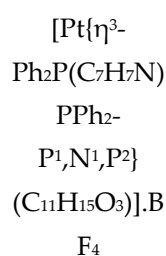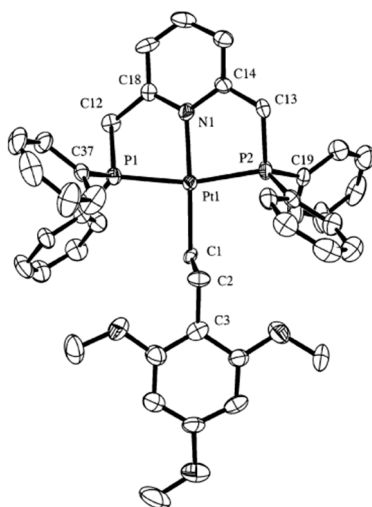

catalytic hydroarylation of  
olefins is promoted by  
dicationic  
platinum(II) complexes; the  
rates of C-C bond  
formation and M-C  
bond cleavage are inversely  
correlated [25]

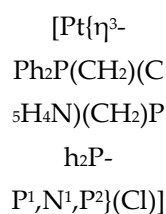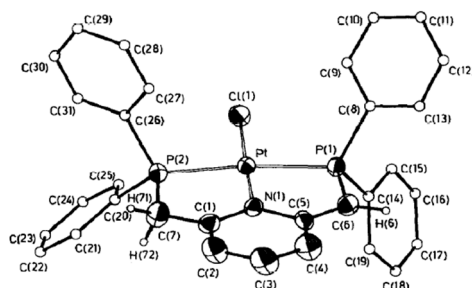

Study of structure and  
mechanism of platinum(II)  
complex formation with the  
anionic terdentate ligand 2-  
(CHPPh<sub>2</sub>)-6-  
(CH<sub>2</sub>PPh<sub>2</sub>)pyridine;  
[27]

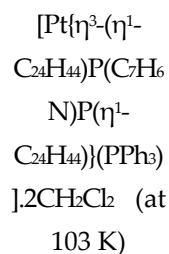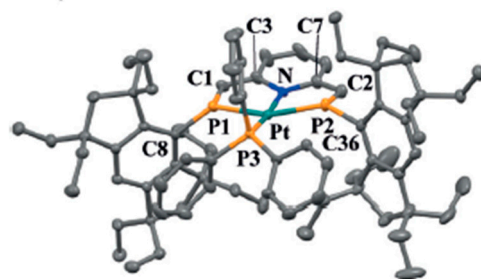

Study of structure and  
mechanism of platinum  
complex formation; a rare  
example of a Pt(0)  
complex that adopts a  
highly planar coordination  
geometry [28]

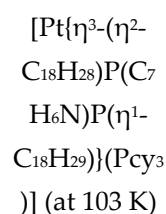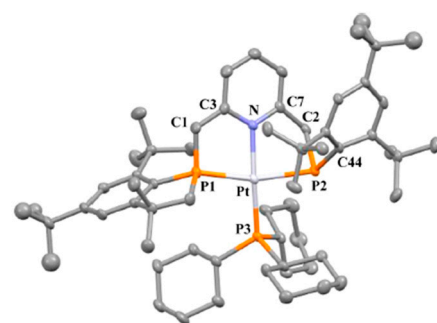

Study of ligand synthesis  
and structure of platinum  
complex formed; platinum-  
catalyzed synthesis of an  
unsymmetrical PNP-  
pincer-type phosphalkene  
ligand (PPEP) from  
bis(phosphaethenyl)pyridi  
ne (BPEP) via  
intramolecular C-H  
addition/cyclization of the  
CH=PMes\* group [29]

**Table S2.** Structures and applications of  $\text{Pt}\{\eta^3\text{-P}^1\text{C}^1\text{P}^2\}(\text{Y})$ , ( $\text{Y}=\text{O}^2\text{L}, \text{N}^2\text{L}, \text{CL}, \text{Cl}, \text{Br}$ ) complexes<sup>a</sup>

| Complex                                                                                                                                                 | Structures                                                                           | Ref.                                                                                                                                                                           |
|---------------------------------------------------------------------------------------------------------------------------------------------------------|--------------------------------------------------------------------------------------|--------------------------------------------------------------------------------------------------------------------------------------------------------------------------------|
| $[\text{Pt}\{\eta^3\text{-(CF}_3)_2\text{P(C}_8\text{H}_7\text{)P(CF}_3)_2\}$<br>$(\text{H}_2\text{O})]\text{SbF}_6$<br>(at 150 K)                      | 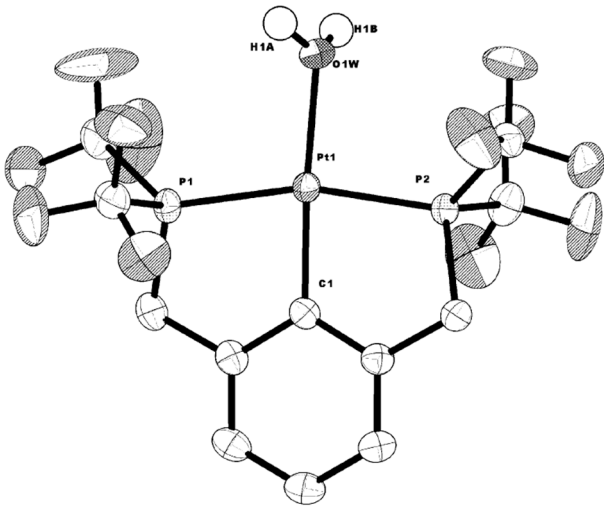  | synthetic strategies toward the synthesis of electron-poor pincer complexes serving as a catalyst for ethylene hydrogenation and providing ethylene dimerization activity [30] |
| $[\text{Pt}\{\eta^3\text{-(CF}_3)_2\text{P(C}_8\text{H}_7\text{)P(CF}_3)_2\}$<br>$(\text{NC}_5\text{F}_5)]\text{B(C}_6\text{F}_5)_4$<br>4<br>(at 150 K) |  |                                                                                                                                                                                |
| $[\text{Pt}\{\eta^3\text{-Ph}_2\text{P(C}_8\text{H}_7\text{)PPh}_2\}$<br>$(\text{H}_2\text{O})]\text{CF}_3\text{SO}_3$<br>(at 165 K)                    |   | Study on the synthesis, stability and CO <sub>2</sub> insertion reactivity of a (PCP) platinum methoxide complex [31]                                                          |

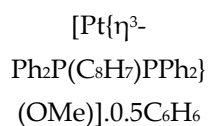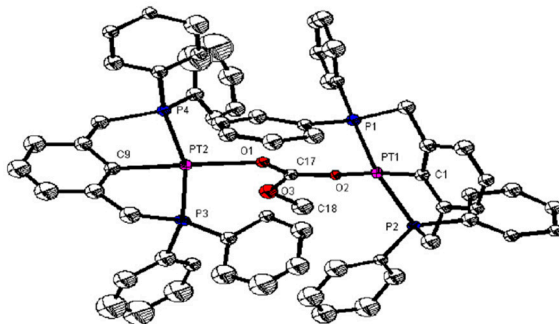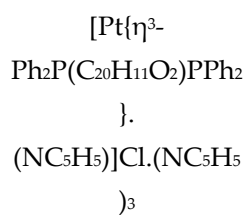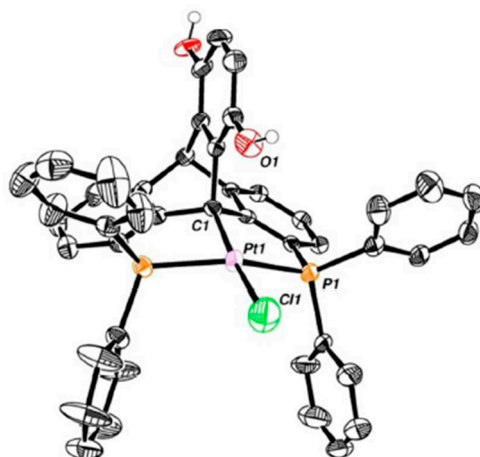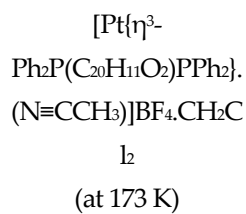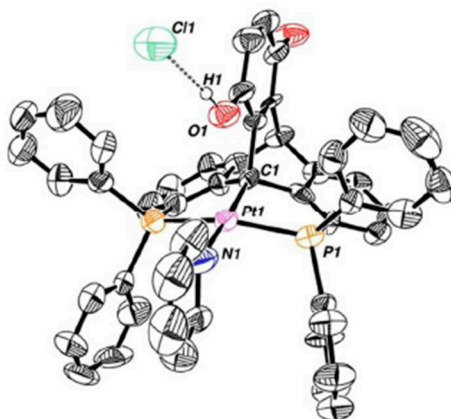

the synthesis,  
coordination chemistry  
and preliminary  
description of the  
catalytic properties of  
some new platinum  
diphosphine  $\text{PC}(\text{sp}^3)\text{P}$ -  
pincer complexes  
bearing  
the functionalized  
ligand [33]

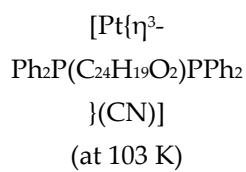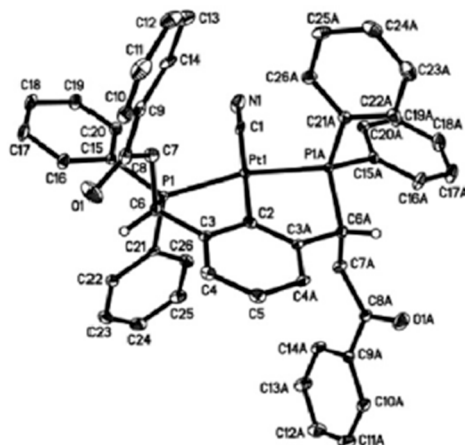

Structural study of Pt–C bonds in P–C–P pincer complexes; pincer complexes as potential (stereo)selective catalysts [34]

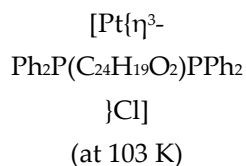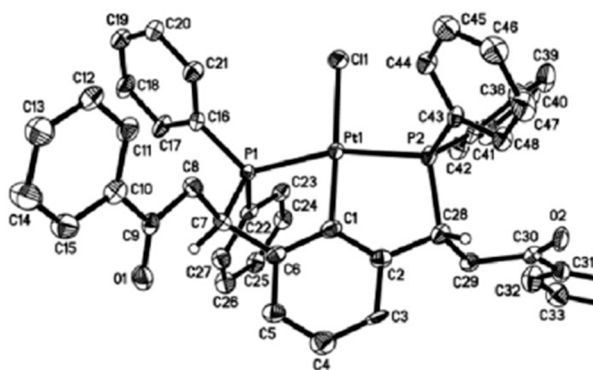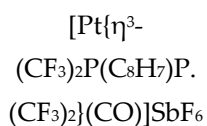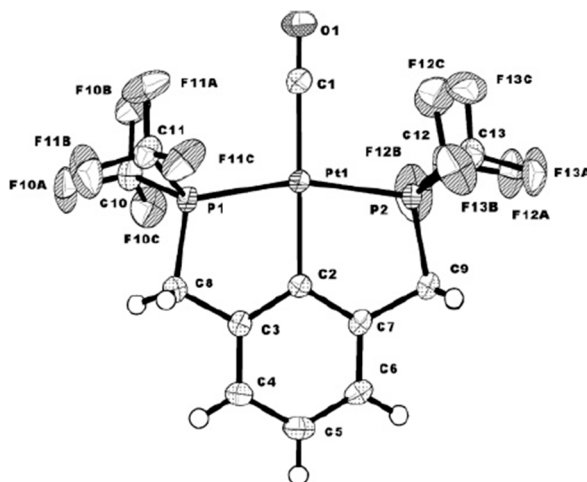

The synthesis of perfluoroalkyl-substituted “pincer”-type PCP ligands, and platinum coordination studies [35]

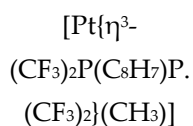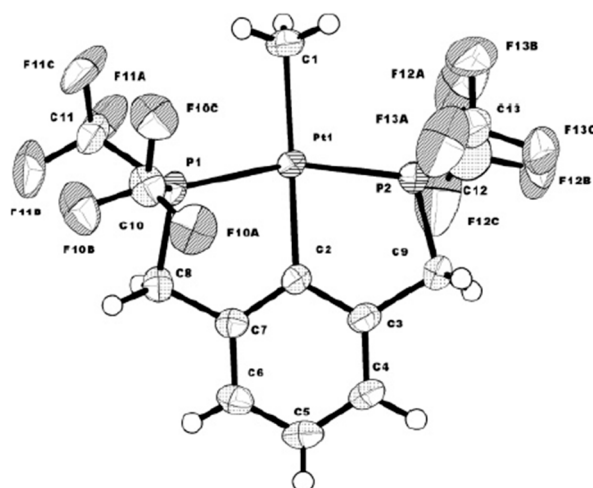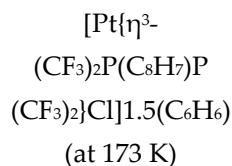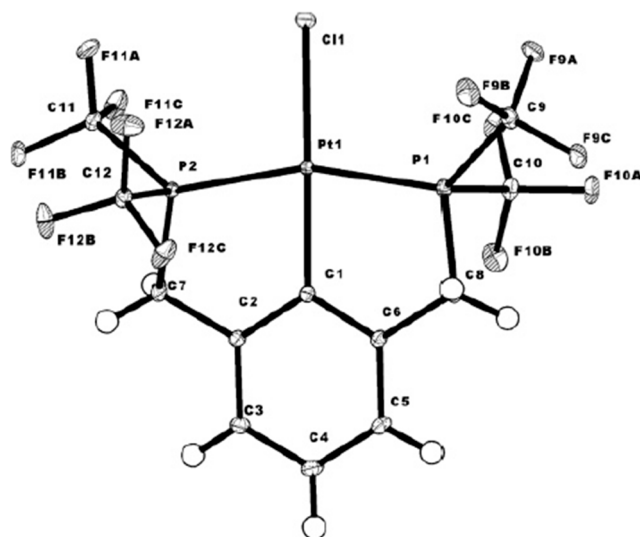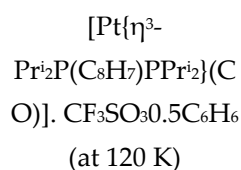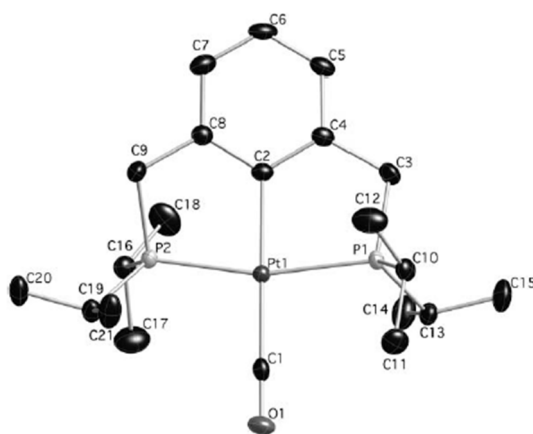

synthesis and characterization of several Pt(II) complexes, including formyl complexes, based on the PCP-type pincer ligands; study on reactivity, stability and the significance of sterics [36]



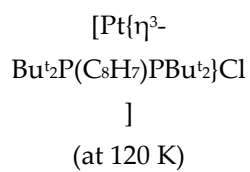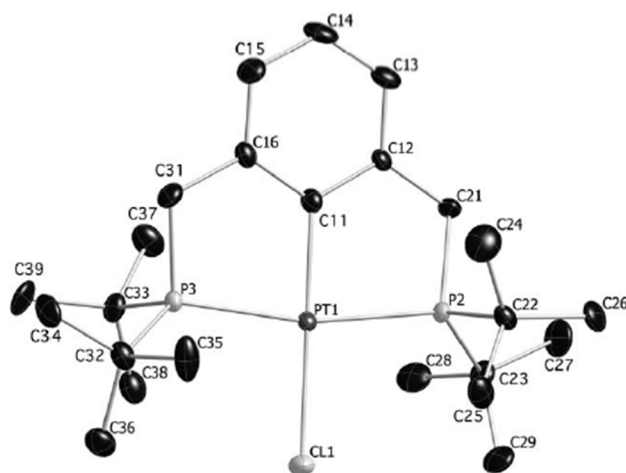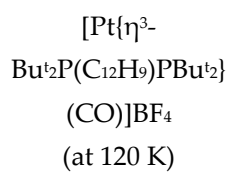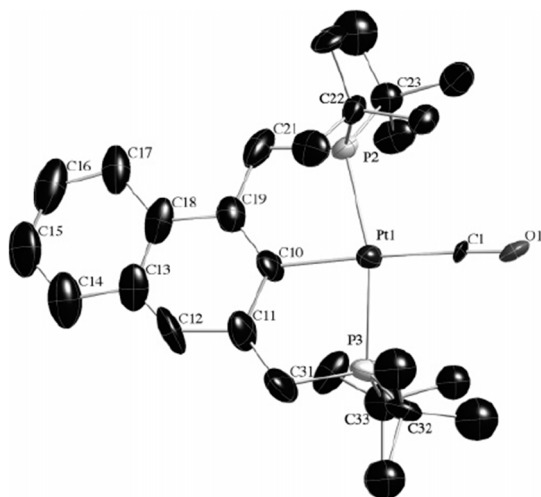

A series of naphthyl-based PCP Pt(II) complexes was synthesized and characterized as for their structure and reactivity; [37]

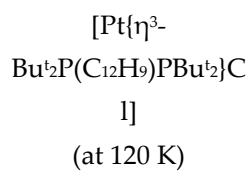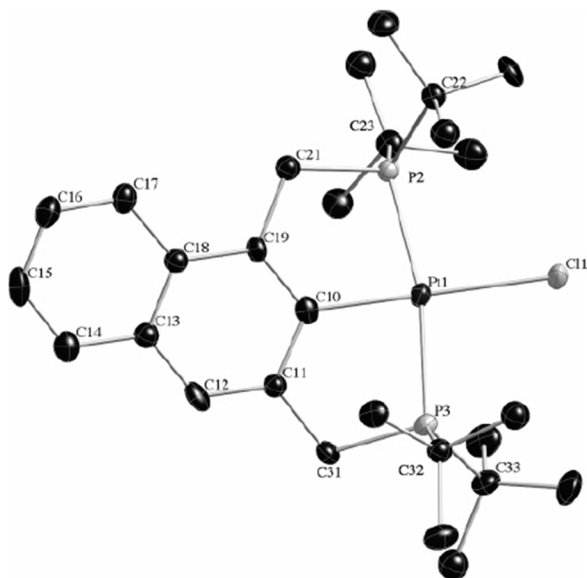

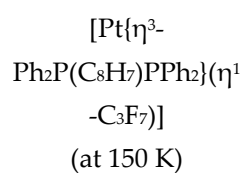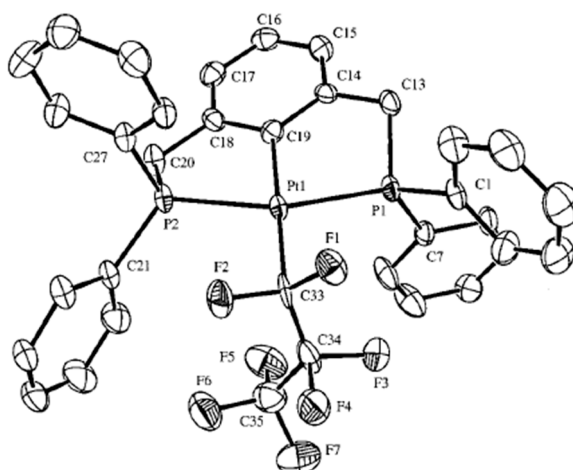

Synthesis and molecular  
structure  
characterization of a  
perfluoroalkyl  
complex of platinum  
containing a PCP pincer  
ligand [38]

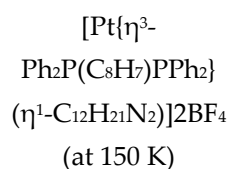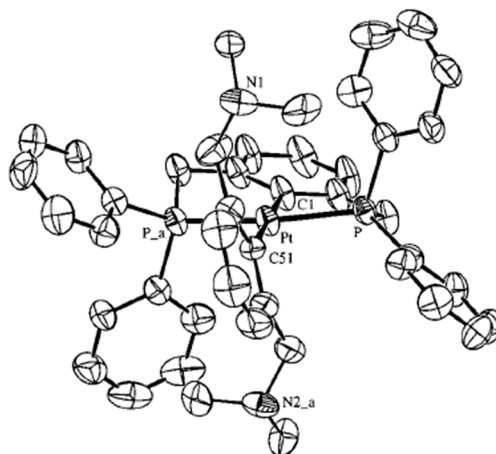

The bis(ortho-)chelated  
platinum complex has  
been used as a novel  
metal precursor for C-H  
bond activation and  
subsequent  
cyclometalation of the  
potentially  
terdentate coordinating  
pincer ligand [40]

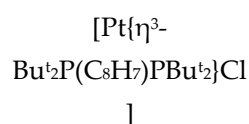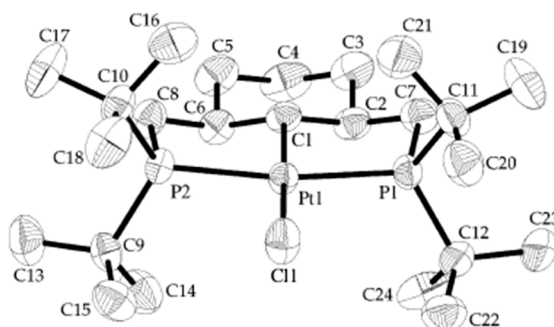

Extension of the family  
of PCP ligands  
with aliphatic  
cyclohexane backbones;  
synthesis and  
characterisation of  
PCsp<sup>3</sup>P phosphine and  
phosphinite  
platinum(II) complexes;  
a possible explanation  
for the different  
reactivity of  
phosphine and  
phosphinite based  
ligands [41]

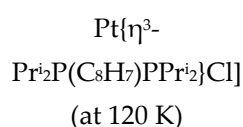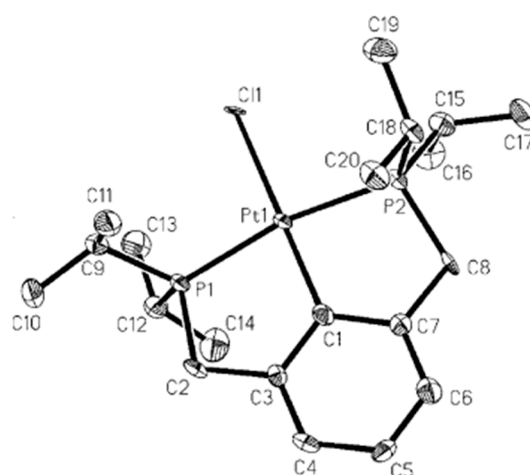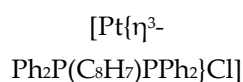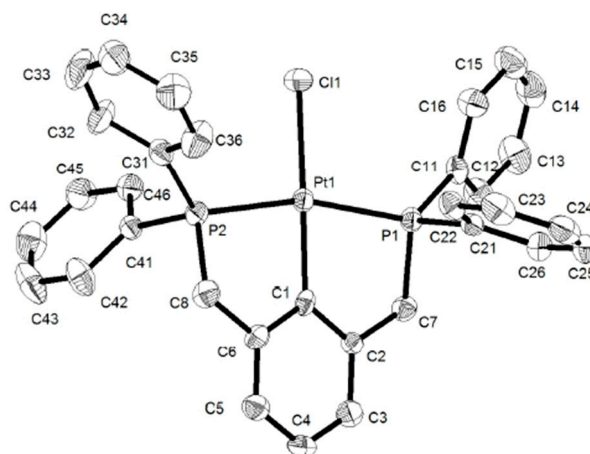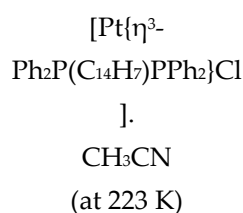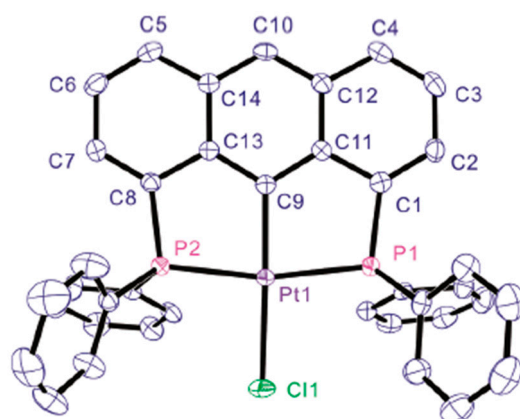

Synthesis and structural characterization of C-metalated diazoalkane complexes of platinum based on PCP- and PCN-type ligands; the reactivity of C-metalated diazoalkane complexes is strongly dependent on the pincer-ligand properties [42]

structure report on {2,6-Bis[(diphenylphosphino)methyl]-phenyl}chloroplatinum(II) complex belonging to a group of complexes extensively used in catalysis [43]

Study on photooxidation of a platinum-anthracene pincer complex: formation and structures of PtII-anthrone and -ketal complexes; unlike the photooxidation of anthracene, which gives rise to many of secondary photoproducts and thermal products, photooxygenation of PtII(DPA)Cl (DPA = 1,8-bis(diphenylphosphino)anthracene) produces

[Pt{ $\eta^3$ -  
Ph<sub>2</sub>P(C<sub>13</sub>H<sub>7</sub>O<sub>2</sub>)PPh<sub>2</sub>}  
Cl].CH<sub>3</sub>CN  
(at 223 K)

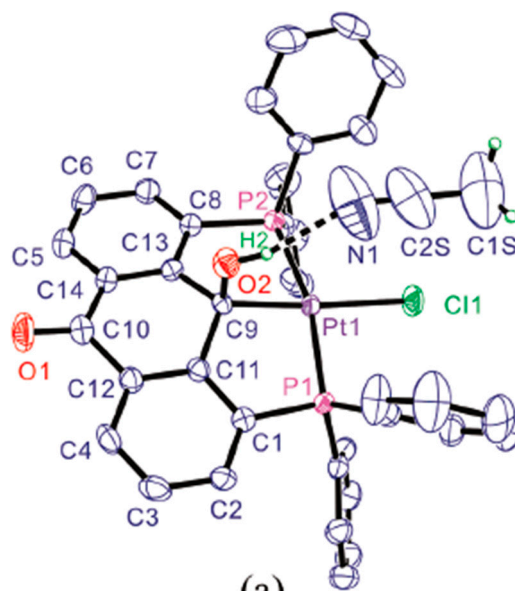

[Pt{ $\eta^3$ -  
Ph<sub>2</sub>P(C<sub>18</sub>H<sub>19</sub>O<sub>8</sub>)  
PPh<sub>2</sub>}Cl].CH<sub>2</sub>Cl<sub>2</sub>  
(at 103 K)

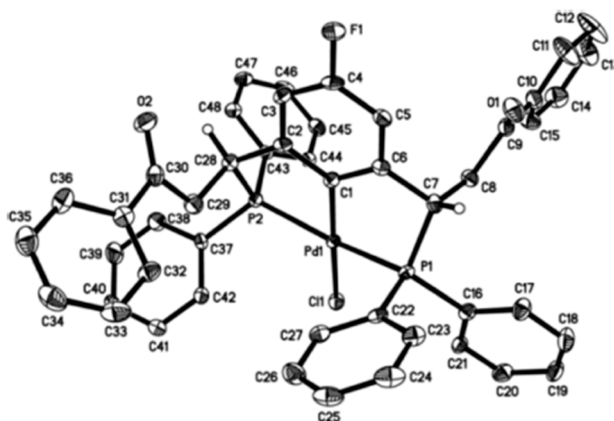

three oxidized  
complexes  
sequentially [44]

Versatile syntheses and structural characterization of optically pure PCE pincer ligands: facile modifications of the pendant arms and ligand backbones; minor structural changes on these novel pincer complexes affect their chemical properties significantly when they were applied as catalysts for the reaction between diphenylphosphine and chalcone [45]

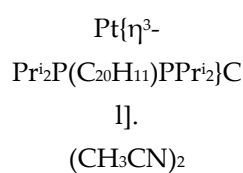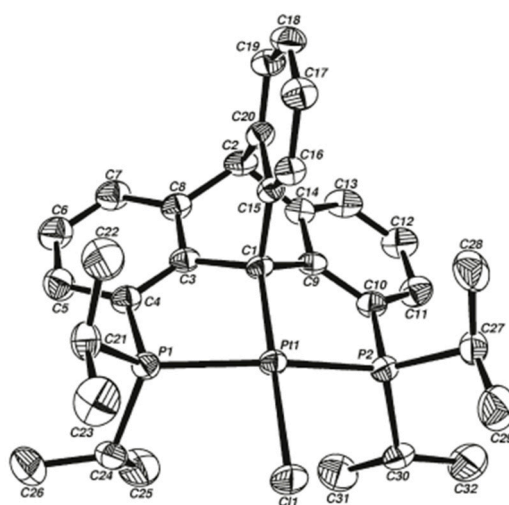

Trans-chelating bis(diisopropylphosphino)tritycene was employed as a platform for the construction of a new class of C(sp<sup>3</sup>)-metalated pincer complexes via C-H activation; synthesis and structural study; excellent thermal and conformational stability; unique structural motif for the design of PC(sp<sup>3</sup>)P-based compounds with new steric and electronic features [46]

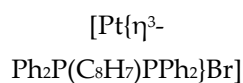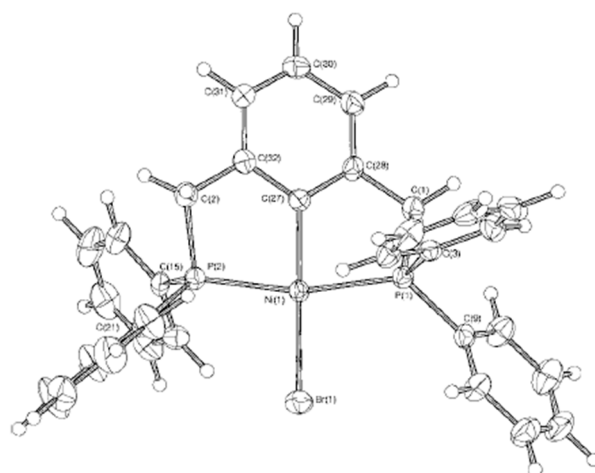

Synthesis and X-ray structural analysis of PtII complex with the potentially tridentate ligand 1,3-bis(diphenylphosphino)methyl)benzene [57]

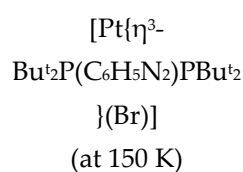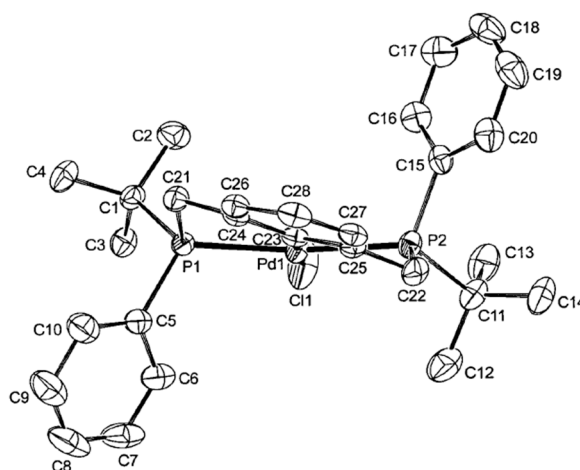

Synthesis and structural characterization of the first P-stereogenic PCP pincer ligands, their metallation by platinum and preliminary catalytic activity study (no significant effect of PtII complexes in chiral catalysis) [47]

**Table S3.** Structures and applications of  $\text{Pt}(\eta^3\text{-P}^1\text{X}^1\text{P}^2)(\text{Y})$ , ( $\text{X}^1 = \text{S}^1$  or  $\text{Si}^1$ ) ( $\text{Y} = \text{C}^2\text{L}, \text{Cl}, \text{P}^3\text{L}, \text{I}, \text{H}, \text{O}^2\text{L}$ ) complexes<sup>a</sup>

| Complex                                                                                                                                                                              | Structures                                                                           | Ref.                                                                                                                                                                                                                                                                                                                                                                                                            |
|--------------------------------------------------------------------------------------------------------------------------------------------------------------------------------------|--------------------------------------------------------------------------------------|-----------------------------------------------------------------------------------------------------------------------------------------------------------------------------------------------------------------------------------------------------------------------------------------------------------------------------------------------------------------------------------------------------------------|
| $[\text{Pt}\{\eta^3\text{-Ph}_2\text{P}(\text{C}_6\text{H}_4)\text{S}(=\text{O})(\text{C}_6\text{H}_4)\text{PPh}_2\}(\text{PPh}_3)] \cdot 0.5(\text{CH}_2\text{Cl}_2)$<br>(at 100 K) | 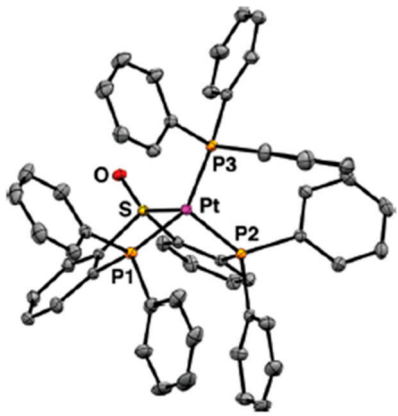    | <p>study aimed to assess the electronic effects of incorporating a sulfinyl donor into a pincer-type ligand; the preparation of a new tridentate diphosphinosulfinyl ligand; the synthesis and properties of its (S(O)P2 pincer-type) Pt complexes; the ligand's geometric flexibility and ability to form highly electrophilic complexes may prove useful for bond activation processes and catalysis [48]</p> |
| $[\text{Pt}\{\eta^3\text{-Ph}_2\text{P}(\text{CH}_2)_2\text{S}(=\text{O})(\text{CH}_2)_2\text{PPh}_2\}(\text{Cl})] \cdot \text{ClO}_4$                                               |    | <p>synthesis and structural analysis of square-planar platinum(II) complex with a novel P-S(O)-P tridentate ligand as a potential stable chiral catalyst [49]</p>                                                                                                                                                                                                                                               |
| $[\text{Pt}\{\eta^3\text{-Ph}_2\text{P}(\text{CH}_2)_2\text{S}(\text{CH}_2)_2\text{PPh}_2\}(\text{PPh}_3)] \cdot 2\text{ClO}_4 \cdot \text{Me}_2\text{CO}$<br>(at 120 K)             |  | <p>investigation of the relationship between structure and reactivity of tridentately chelated Pt(II) complexes; synthesis and structural characterization of [bis(2-diphenylphosphinoethyl)sulfide-κ3P,S,P'](triphenylphosphine-κP)platinum(II) diperchlorate acetone solvate [50]</p>                                                                                                                         |

[Pt( $\eta^3$ -  
Ph<sub>2</sub>P(C<sub>23</sub>H<sub>28</sub>S)PPh<sub>2</sub>)  
(I)](I).1.74 CH<sub>2</sub>Cl<sub>2</sub>  
(at 173 K)

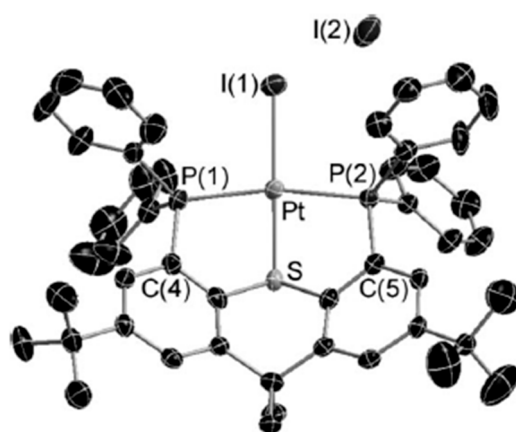

Pt(II) complexes of an ambiphilic PSB-ligand: investigations into  $\eta^3$ (BCC)-triarylborane coordination (synthesis and structural characterization); besides fundamental studies into the electronic consequences and metal-ligand interactions involved in metal-borane coordination, metal-borane complexes are also of great interest for the development of new catalytic reactivity (increase of the coordination number by one, reduction of the d-electron count by two units, often resulting in unusual geometries for a given d-electron configuration, binding, positioning and/or activating organic substrates (bifunctional catalysis), coordination or abstraction) [51]

structural study on characterization the solution and solid-state structures of Pt PSiP pincer-supported hydrides [52]

[Pt( $\eta^3$ -  
cyh<sub>2</sub>P(C<sub>6</sub>H<sub>4</sub>)Si(Me).  
(C<sub>6</sub>H<sub>4</sub>)Pcyh<sub>2</sub>}(H))].0.  
5 pentane (at 150 K)

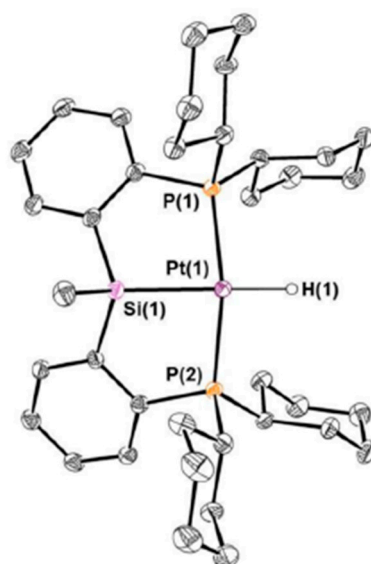

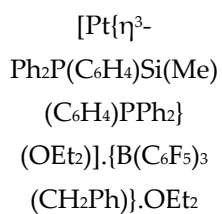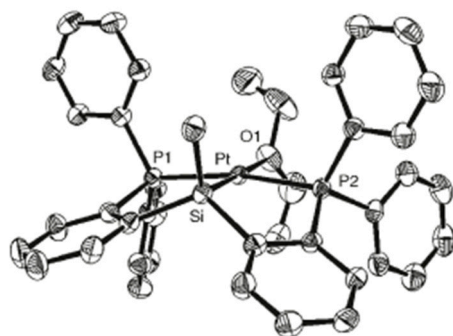

synthesis and characterization of a new series of neutral and cationic platinum(II) complexes bearing the tridentate pincer-like bis(phosphino)silyl ligands: Si-H and Si-Cl bond activation chemistry (modification of the steric and electronic properties of the [R-PSiP] ligand directs the outcome of reactions with hydrido-chlorosilanes toward either Si-H or net Si-Cl bond cleavage) [53]

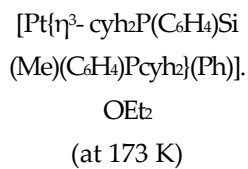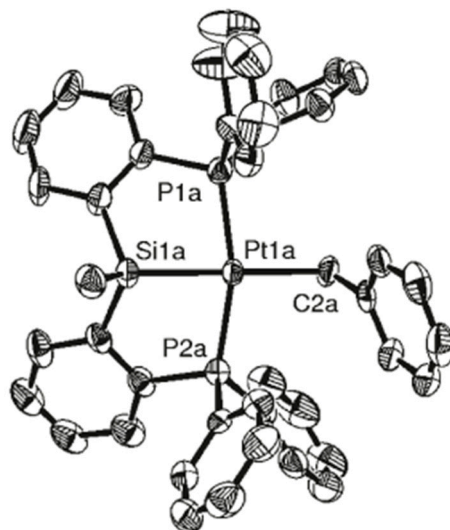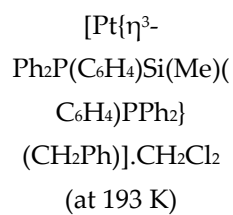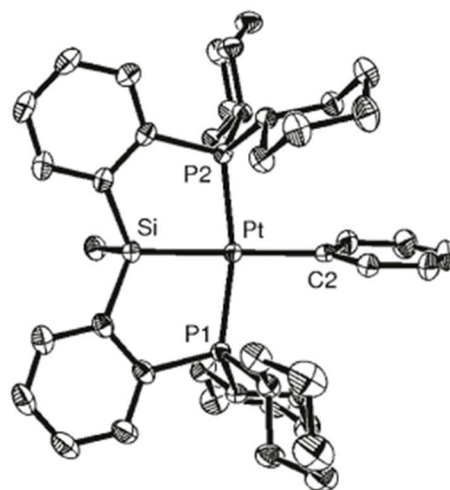



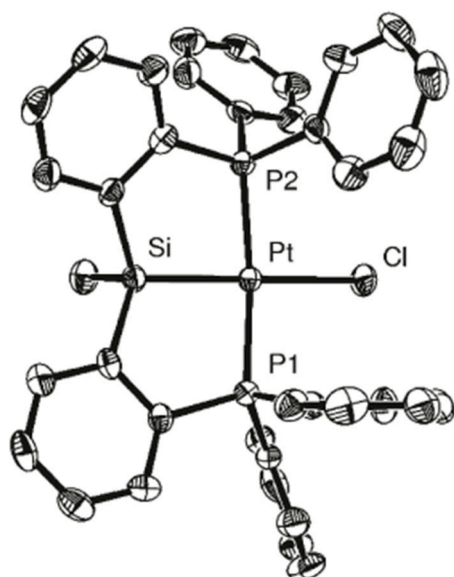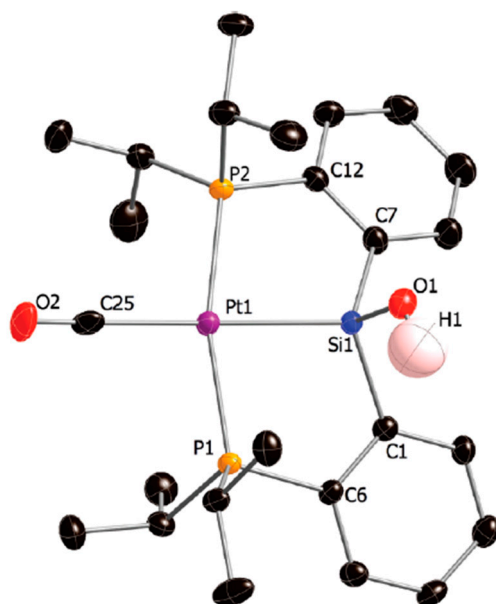

synthesis, structure, and unusual reactivity of silanol-based pincer Pt(II) complexes; dual reactivity, hydrolytic rearrangement and coupling resulting in the unusual mono- or binuclear complexes [54]

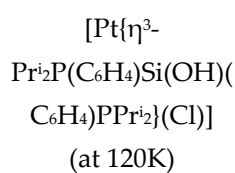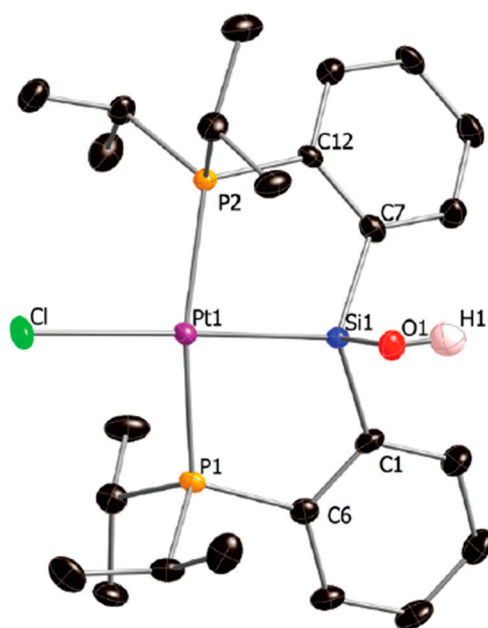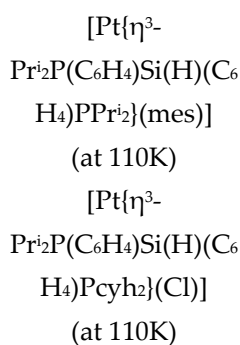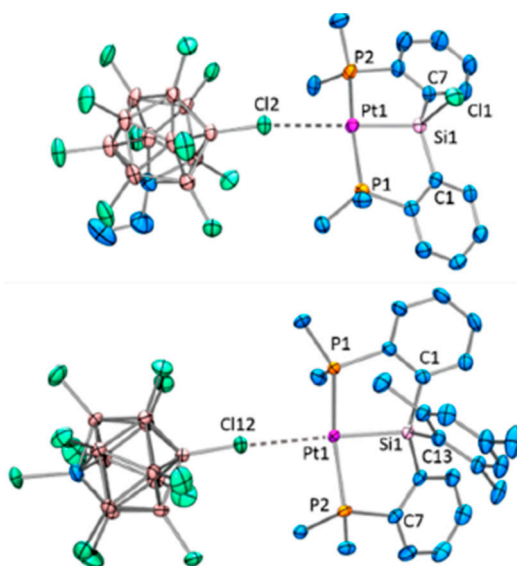

Silyl–silylene interplay in cationic PSiP pincer complexes of platinum; species of the type  $(\text{P}_2\text{Si}=\text{PtR})$  undergo a net 1,2-migration of R from Pt to Si, which leads to highly unsaturated Pt cations displaying only a very distant interaction with the weakly coordinating carborane anion; synthesis and structural study [55]

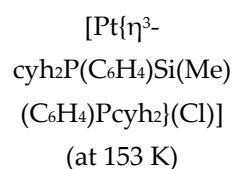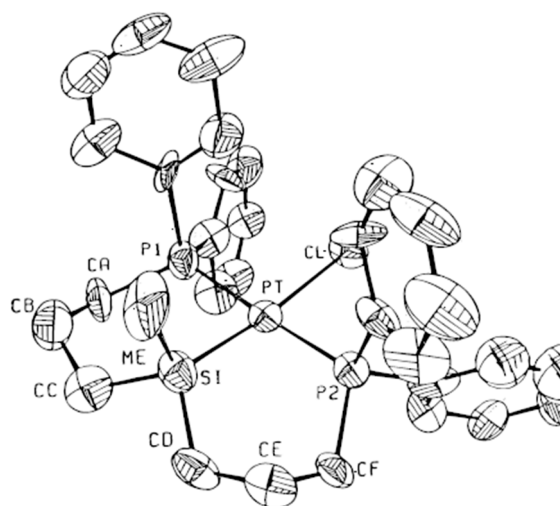

Study on the stereochemistry of the tridentate bis(diphenylphosphinopropyl)silyl (biPSi) framework; complexation providing discrimination at coordinatively unsaturated metal centers; synthesis and structural characterization of  $\text{Pt}[\text{SiMe}(\text{CH}_2\text{CH}_2\text{CH}_2\text{PPh}_2)_2]\text{Cl}$  complex [56]
